# Supplementary material for: Association between acetylcholinesterase inhibitors and risk of stroke in patients with dementia
Source: PubMed Central journal article supplement (PMC4932523; doi:10.1038/srep29266), 2016-07-05
Supplement: srep29266-s1.pdf [file srep29266-s1.pdf]

**Association between acetylcholinesterase inhibitors and risk of stroke  
in patients with dementia**

Yi-Ting Lin<sup>1,5,6</sup>, Ping-Hsun Wu<sup>1,7</sup>, Cheng-Sheng Chen<sup>3,8</sup>, Yi-Hsin Yang<sup>2</sup>, Yuan-Han  
Yang<sup>4,9,10</sup>

<sup>1</sup>Graduate Institute of Clinical Medicine, College of Medicine, Kaohsiung Medical  
University, Kaohsiung, Taiwan

<sup>2</sup>School of Pharmacy, College of Pharmacy, Kaohsiung Medical University,  
Kaohsiung, Taiwan

<sup>3</sup>Department of Psychiatry, Kaohsiung Medical University, Kaohsiung, Taiwan

<sup>4</sup>Department of Neurology, Kaohsiung Medical University, Kaohsiung, Taiwan

<sup>5</sup>Department of Family Medicine, Kaohsiung Municipal Hsiao-Kang Hospital,  
Kaohsiung

<sup>6</sup>Department of Family Medicine, Kaohsiung Municipal Hsiao-Kang Hospital,  
Kaohsiung

<sup>7</sup>Division of Nephrology, Department of Internal Medicine, Kaohsiung Medical  
University Hospital, Kaohsiung

<sup>8</sup>Department of Psychiatry, Kaohsiung Medical University Hospital, Kaohsiung,  
Taiwan

<sup>9</sup>Department of Neurology, Kaohsiung Medical University Hospital, Kaohsiung,

Taiwan

<sup>10</sup>Department of Neurology, Kaohsiung Municipal Ta-Tung Hospital, Kaohsiung,

Taiwan

**Corresponding author:**

Yuan-Han Yang MD, PhD

Department of Neurology, Kaohsiung Medical University Hospital

No.100, Tzyou 1st Road Kaohsiung 807 , Kaohsiung, Taiwan

Telephone number: +886-7-3121101 ext 5408

Fax number: +886-7-3162158

E-mail address: [endless@kmu.edu.tw](mailto:endless@kmu.edu.tw)

## **Supplementary Online Content**

**Supplemental Figure S1.** Study flow chart

**Supplemental Figure S2.** Cumulative incidences of ischemic stroke of Alzheimer's disease patients who were or were not treated with acetylcholinesterase inhibitors.

Data were compiled after adjustment for competing mortality. For cumulative incidences of ischemic stroke, calculation and comparison in competing risk data ratios were conducted using modified Kaplan-Meier and Gray methods.

**Supplementary Table S1.** ICD-9-CM codes used to identify clinical conditions

**Supplementary Table S2.** Drug (Anatomical Therapeutic Chemical code) concomitant prescriptions in the present study

**Supplementary Table S3.** Baseline characteristics of Alzheimer's disease patients receiving acetylcholinesterase inhibitors or not matched by age and sex

**Supplementary Table S4.** Follow-up duration, numbers, and incidence rate of ischemic stroke among Alzheimer's disease patients using and not using acetylcholinesterase inhibitors

**Supplementary Table S5.** Hazard ratio for ischemic stroke among acetylcholinesterase inhibitors users and nonusers in Alzheimer's disease cohort using various analytical models

**Supplementary Table S6.** Incidence rate, crude and adjusted HRs of ischemic stroke associated with acetylcholinesterase inhibitors use during the follow-up period in the age- and sex-matched Alzheimer's disease cohort

**Supplemental Figure S1. Study flow chart**

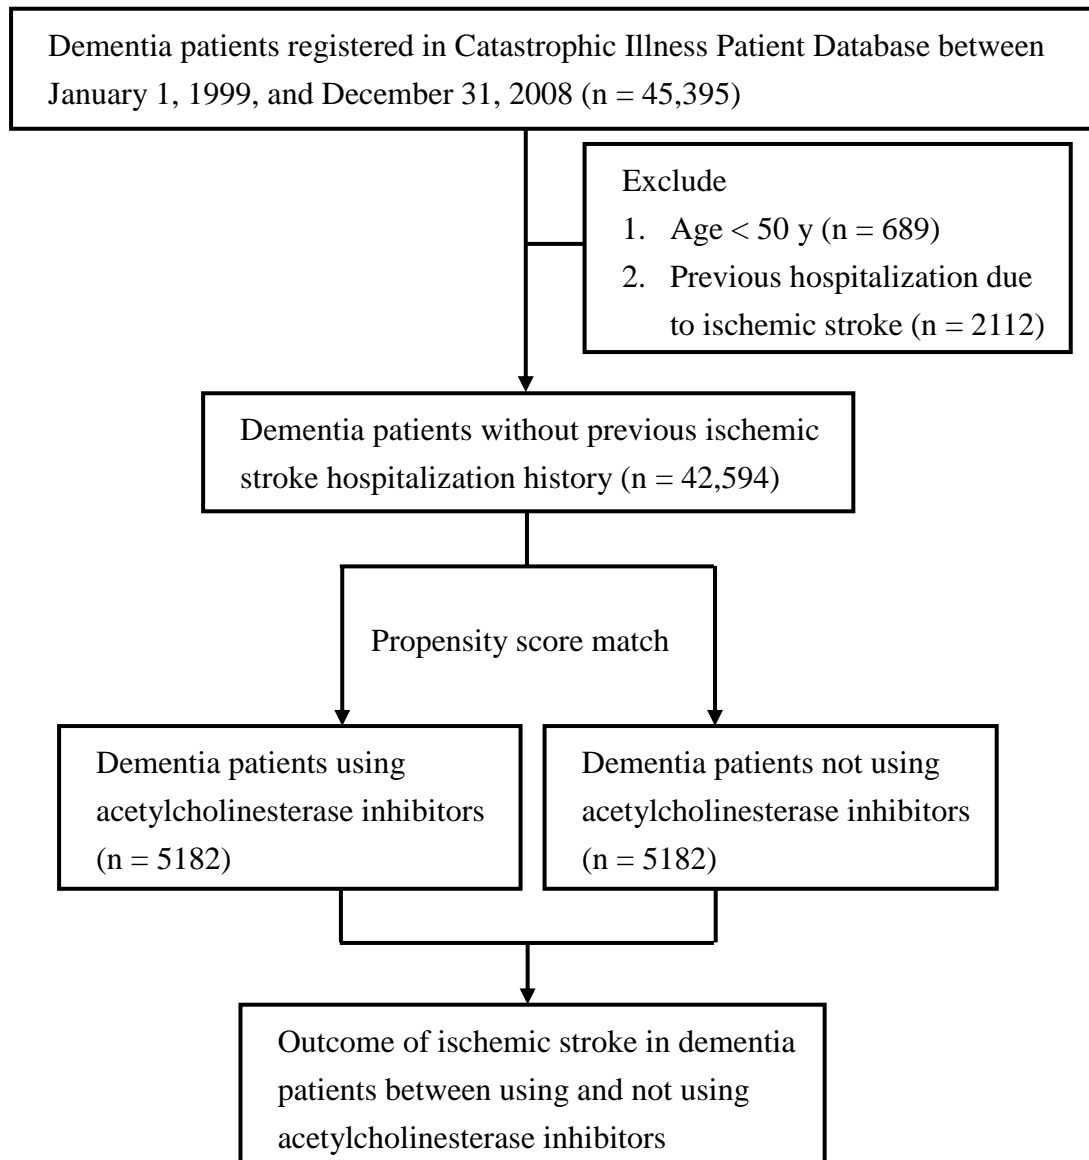

**Supplemental Figure S2.** Cumulative incidences of ischemic stroke of Alzheimer's disease patients who were or were not treated with acetylcholinesterase inhibitors. Data were compiled after adjustment for competing mortality. For cumulative incidences of ischemic stroke, calculation and comparison in competing risk data ratios were conducted using modified Kaplan-Meier and Gray methods.

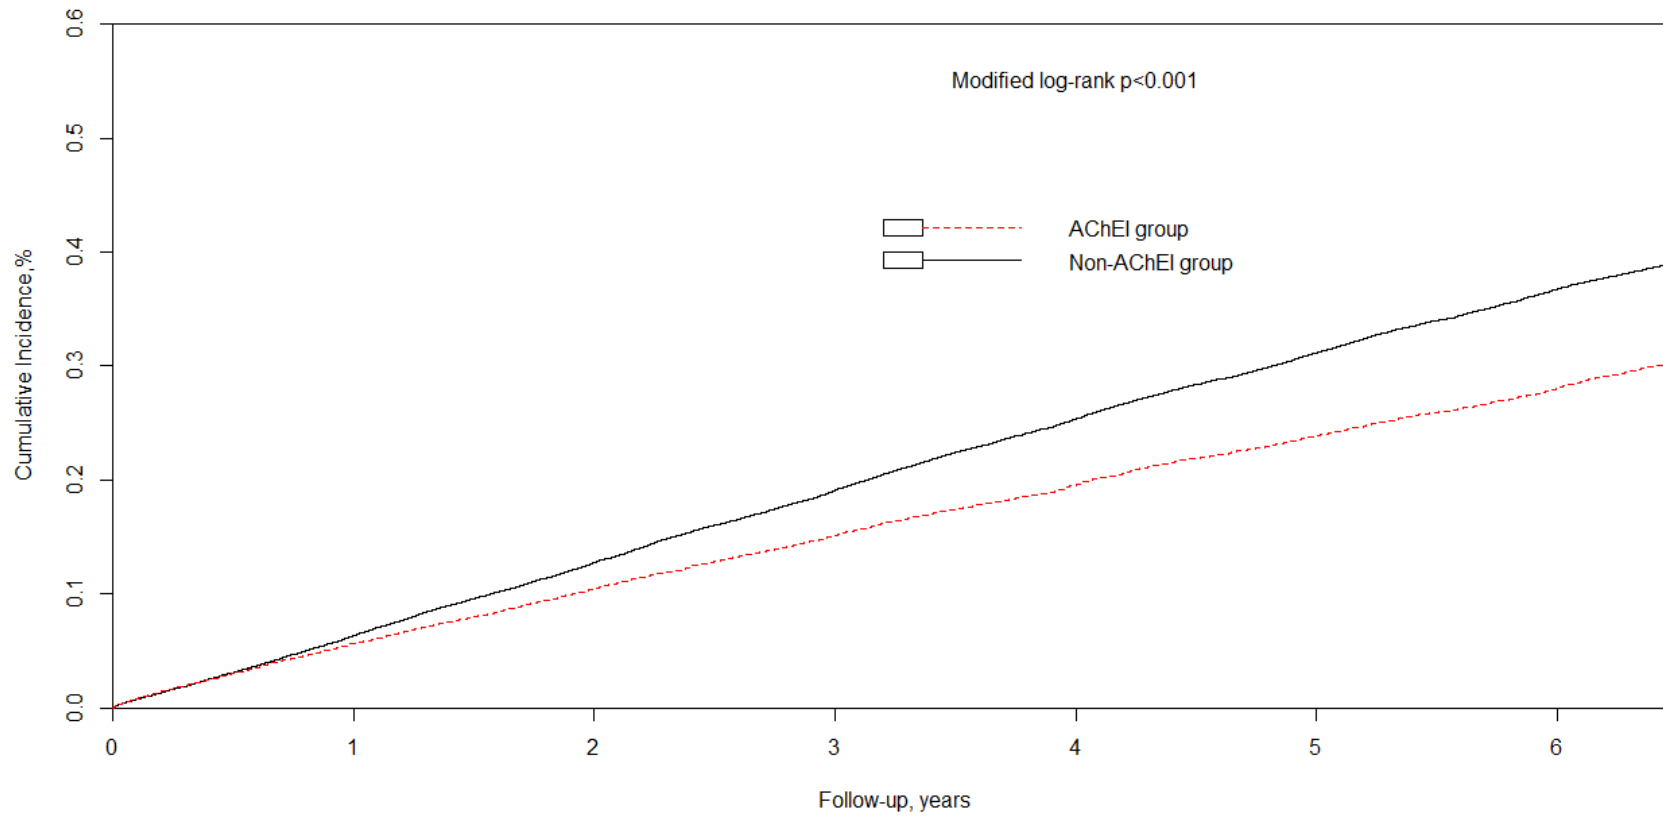

**Supplementary Table S1. ICD-9-CM codes used to identify clinical conditions**

| Diagnosis                             | Corresponding ICD-9 codes                                                           |
|---------------------------------------|-------------------------------------------------------------------------------------|
| Dementia                              | 290, 331.0                                                                          |
| Ischemic stroke                       | 433, 434, 436                                                                       |
| Diabetes mellitus                     | 250                                                                                 |
| Hypertension                          | 401–405                                                                             |
| Hyperlipidemia                        | 272                                                                                 |
| Coronary artery disease               | 410–414, 429.2                                                                      |
| Heart failure                         | 398.91, 402.01, 402.11, 402.91, 404.01, 404.03, 404.11, 404.13, 404.91, 404.93, 428 |
| Atrial fibrillation                   | 427.3                                                                               |
| Peripheral artery disease             | 440.2–440.4, 443.9                                                                  |
| Chronic obstructive pulmonary disease | 491, 492, 496                                                                       |
| Chronic kidney disease                | 250.4, 274.1, 403.1, 404.2, 404.3, 580, 582, 583, 585, 586, 587                     |
| Malignancy                            | 140–208                                                                             |
| Depression                            | 296.2, 296.3, 296.82, 300.4, 309.0, 309.1, 311                                      |

ICD, international classification of disease

**Supplementary Table S2.** Drug (Anatomical Therapeutic Chemical code) concomitant prescriptions in the present study

| Drug type                                                             | ATC classification system codes          | Drug name                                                                                                                                                                                                                                                                                                                                                                                 |
|-----------------------------------------------------------------------|------------------------------------------|-------------------------------------------------------------------------------------------------------------------------------------------------------------------------------------------------------------------------------------------------------------------------------------------------------------------------------------------------------------------------------------------|
| Antiplatelets                                                         | B01AC04, B01AC05, B01AC06                | Clopidogrel, Ticlopidine, Acetylsalicylic acid (Aspirin)                                                                                                                                                                                                                                                                                                                                  |
| Dipyridamole                                                          | B01AC07                                  | Dipyridamole                                                                                                                                                                                                                                                                                                                                                                              |
| Anticoagulants                                                        | B01AA03                                  | Warfarin                                                                                                                                                                                                                                                                                                                                                                                  |
| Angiotensin-converting enzyme inhibitors (ACEIs)                      | C09A, C09B                               | Captopril, Enalapril, Lisinopril, Perindopril, Ramipril, Quinapril, Benazepril, Cilazapril, Fosinopril, Imidapril                                                                                                                                                                                                                                                                         |
| Angiotensin receptor blockers (ARBs)                                  | C09C, C09D                               | Candesartan, Irbesartan, Losartan, Olmesartan, Telmisartan, Valsartan                                                                                                                                                                                                                                                                                                                     |
| Beta-blockers                                                         | C07A                                     | Labetalol, Pindolol, Acebutolol, Alprenolol, Atenolol, Betaxolol, Bisoprolol, Carteolol, Carvedilol, Nadolol, Metoprolol, Oxprenolol, Propranolol, Sotalol, Timolol, Metipranolol, Esmolol                                                                                                                                                                                                |
| Thiazides                                                             | C03AA03, C03AA06                         | Hydrochlorothiazide, Trichlormethiazide                                                                                                                                                                                                                                                                                                                                                   |
| Calcium channel blockers (CCBs)                                       | C08C, C08D, C08E                         | Nifedipine, Nicardipine, Felodipine, Amlodipine, Isradipine, Diltiazem, Verapamil                                                                                                                                                                                                                                                                                                         |
| Statins                                                               | C10AA                                    | Atorvastatin, Fluvastatin, Lovastatin, Pravastatin, Rosuvastatin, Simvastatin                                                                                                                                                                                                                                                                                                             |
| Fibrates                                                              | C10AB                                    | Bezafibrate, Clofibrate, Etofibrate, Gemfibrozil, Fenofibrate, Simfibrate                                                                                                                                                                                                                                                                                                                 |
| Traditional nonsteroidal anti-inflammatory drugs (traditional NSAIDs) | M01AA, M01AB, M01AC, M01AE, M01AG, M01AX | Acemetacin, Aloclofenac, Alminoprofen, Benzydamine, Diclofenac, Diflunisal, Etodolac, Etofenamate, Fenbufen, Flufenamate, Flufenamic acid, Flurbiprofen, Ibuprofen, Iclofenac, Indomethacin, Ketoprofen, Ketorolac, Meclofenamate, Meclofenamic acid, Naproxen, Piroxicam, Spirin, Sulindac, Niflumic acid, Tenoxicam, Tiaprofenic acid, Tiaramide, Tolmetin, Tolfenamic acid, Mepirizole |
| Cyclooxygenase-2- selective inhibitors (COX-2 inhibitors)             | M01AH                                    | Celecoxib, Meloxicam, Rofecoxib, Etoricoxib, Nimesulide                                                                                                                                                                                                                                                                                                                                   |
| Proton pump inhibitors (PPIs)                                         | A02BC                                    | Omeprazole, Esomeprazole, Pantoprazole, Lansoprazole, Rabeprazole                                                                                                                                                                                                                                                                                                                         |
| H-2 receptor antagonists                                              | A02BA                                    | Cimetidine, Ranitidine, Famotidine                                                                                                                                                                                                                                                                                                                                                        |
| Antidepressants                                                       | N06A                                     | Fluoxetine, Citalopram, Paroxetine, Sertraline, Fluvoxamine, Escitalopram, Imipramine, Clomipramine, Amitriptyline, Doxepin, Dosulepin, Maprotiline, Melitracen, Nortriptyline, Moclobemide, Duloxetine, Milnacipran, Venlafaxine, Trazodone, Mirtazapine, Bupropion                                                                                                                      |

Antipsychotics

N05A

Chlorpromazine, clopenthixol, clothiapine, flupenthixol, fluphenazine, haloperidol, levomepromazine, loxapine, methotrimeprazine, perphenazine, pimozide, pipotiazine, prochlorperazine, sulpiride, trifluoperazine, thioridazine, amisulpride, aripiprazole, clozapine, olanzapine, quetiapine, risperidone, ziprasidone, and zotepine

---



**Supplementary Table S3.** Baseline characteristics of Alzheimer’s disease patients receiving acetylcholinesterase inhibitors or not matched by age and sex

|                                | AD Patients using AChEIs (n = 2649) |       | AD Patients not using AChEIs (n = 2649) |      | <i>P</i> -value |
|--------------------------------|-------------------------------------|-------|-----------------------------------------|------|-----------------|
|                                | N                                   | %     | n                                       | %    |                 |
| <b>Age, years</b>              |                                     |       |                                         |      | 0.984           |
| 50–59                          | 80                                  | 3     | 75                                      | 2.8  |                 |
| 60–69                          | 394                                 | 14.9  | 394                                     | 14.9 |                 |
| 70–79                          | 1222                                | 46.1  | 1222                                    | 46.2 |                 |
| ≥80                            | 952                                 | 36    | 952                                     | 36   |                 |
| <b>Sex</b>                     |                                     |       |                                         |      | > 0.999         |
| Men                            | 1101                                | 41.6  | 1101                                    | 41.6 |                 |
| Women                          | 1548                                | 58.4  | 1548                                    | 58.4 |                 |
| <b>Urbanization level</b>      |                                     |       |                                         |      | 0.046           |
| City area                      | 2049                                | 77.3  | 1987                                    | 75   |                 |
| Rural area                     | 600                                 | 22.7  | 662                                     | 25   |                 |
| <b>Socioeconomic status</b>    |                                     |       |                                         |      | 0.074           |
| Low                            | 1444                                | 54.5  | 1525                                    | 57.6 |                 |
| Moderate                       | 605                                 | 22.8  | 574                                     | 21.7 |                 |
| High                           | 600                                 | 22.7  | 550                                     | 20.8 |                 |
| <b>Comorbidities</b>           |                                     |       |                                         |      |                 |
| Diabetes mellitus              | 772                                 | 29.1  | 206                                     | 7.8  | <0.001          |
| Hypertension                   | 1487                                | 56.1  | 417                                     | 15.7 | <0.001          |
| Hyperlipidemia                 | 816                                 | 30.8  | 177                                     | 6.7  | <0.001          |
| Coronary artery disease        | 938                                 | 35.4  | 242                                     | 9.1  | <0.001          |
| Heart failure                  | 338                                 | 12.8  | 99                                      | 3.7  | <0.001          |
| Atrial fibrillation            | 78                                  | 2.9   | 26                                      | 1    | <0.001          |
| Peripheral artery disease      | 123                                 | 4.6   | 22                                      | 0.8  | <0.001          |
| COPD                           | 918                                 | 34.7  | 279                                     | 10.5 | <0.001          |
| Chronic kidney disease         | 144                                 | 5.4   | 48                                      | 1.8  | <0.001          |
| Malignancy                     | 317                                 | 12    | 85                                      | 3.2  | <0.001          |
| Depression                     | 630                                 | 23.8  | 147                                     | 5.5  | <0.001          |
| <b>Concomitant medications</b> |                                     |       |                                         |      |                 |
| Antiplatelets                  | 1029                                | 38.8  | 272                                     | 10.3 | <0.001          |
| Dipyridamole                   | 412                                 | 15.51 | 115                                     | 4.33 | <0.001          |
| Warfarin                       | 61                                  | 2.30  | 17                                      | 0.64 | <0.001          |
| ACEIs                          | 578                                 | 21.8  | 164                                     | 6.2  | <0.001          |
| ARBs                           | 565                                 | 21.3  | 146                                     | 5.5  | <0.001          |
| Beta-blockers                  | 818                                 | 30.9  | 202                                     | 7.6  | <0.001          |

|                          | AD Patients using<br>AChEIs (n = 2649) |      | AD Patients not using<br>AChEIs (n = 2649) |      | <i>P</i> -value |
|--------------------------|----------------------------------------|------|--------------------------------------------|------|-----------------|
|                          | N                                      | %    | n                                          | %    |                 |
| Thiazides                | 660                                    | 24.9 | 182                                        | 6.9  | <0.001          |
| CCBs                     | 1148                                   | 43.3 | 307                                        | 11.6 | <0.001          |
| Statins                  | 910                                    | 34.4 | 195                                        | 7.4  | <0.001          |
| Fibrates                 | 110                                    | 4.2  | 35                                         | 1.3  | <0.001          |
| Traditional NSAIDs       | 1101                                   | 41.6 | 290                                        | 10.9 | <0.001          |
| COX-2 inhibitors         | 713                                    | 26.9 | 168                                        | 6.3  | <0.001          |
| PPIs                     | 360                                    | 13.6 | 95                                         | 3.6  | <0.001          |
| H-2 receptor antagonists | 190                                    | 7.2  | 49                                         | 1.8  | <0.001          |
| Antidepressants          | 781                                    | 29.5 | 173                                        | 6.5  | <0.001          |
| Antipsychotics           |                                        |      |                                            |      |                 |
| <b>AChEIs, cDDD</b>      |                                        |      |                                            |      |                 |
| <28 cDDDs                | 113                                    | 4.3  |                                            |      |                 |
| 28–365 cDDDs             | 1124                                   | 42.4 |                                            |      |                 |
| ≥365 cDDDs               | 1412                                   | 53.3 |                                            |      |                 |

Abbreviations: AD, Alzheimer’s disease; COPD, chronic obstructive pulmonary disease; ACEIs, angiotensin-converting-enzyme inhibitors; ARBs, angiotensin receptor blockers; CCBs, calcium-channel blockers; PPIs, proton-pump inhibitors; H2- receptor antagonists, histamine-2 receptor antagonists; Traditional NSAIDs, traditional nonsteroidal anti-inflammatory drugs; COX-2 inhibitors, cyclooxygenase-2-selective nonsteroidal anti-inflammatory inhibitors; AChEIs, acetylcholinesterase inhibitors

**Supplementary Table S4.** Follow-up duration, numbers, and incidence rate of ischemic stroke among Alzheimer’s disease patients using and not using acetylcholinesterase inhibitors

| Clinical outcome                                | AD Patients using AChEIs (n = 2649) | AD Patients not using AChEIs (n = 2649) |
|-------------------------------------------------|-------------------------------------|-----------------------------------------|
| Total follow-up, person-years                   | 13,700                              | 13,753                                  |
| No. of ischemic stroke                          | 228                                 | 266                                     |
| Incidence rate per 10,000 person-years (95% CI) | 166.4 (145.8–189.1)                 | 193.1 (171.2–217.7)                     |

Abbreviations: CI, confidence interval; AD, Alzheimer’s disease

**Supplementary Table S5.** Hazard ratio for ischemic stroke among acetylcholinesterase inhibitors users and nonusers in Alzheimer’s disease cohort using various analytical models

| Clinical outcome | Adjusted hazard ratio | 95% Confidence interval |
|------------------|-----------------------|-------------------------|
| Ischemic stroke* |                       |                         |
| Model 1          | 0.626                 | 0.512–0.767             |
| Model 2          | 0.615                 | 0.498–0.760             |
| Death            |                       |                         |
| Model 1          | 0.927                 | 0.829–1.037             |
| Model 2          | 0.897                 | 0.801–1.004             |

\*Adjusted for competing death risk

Model 1: adjustment for urbanization, socioeconomic status, and comorbidities

Model 2: adjustment for Model 1 and concomitant medications

**Supplementary Table S6.** Incidence rate, crude and adjusted HRs of ischemic stroke associated with acetylcholinesterase inhibitors use during the follow-up period in the age- and sex-matched Alzheimer's disease cohort

|                          | No. of patients | Incidence rate<br>(95% CI) | Crude               |                 | Adjusted*           |                 | <i>P</i> for<br>Trend |
|--------------------------|-----------------|----------------------------|---------------------|-----------------|---------------------|-----------------|-----------------------|
|                          |                 |                            | HR (95% CI)         | <i>P</i> -value | HR (95% CI)         | <i>P</i> -value |                       |
| <b>Ischemic stroke</b>   |                 |                            |                     |                 |                     |                 |                       |
| Total AChEI use duration |                 |                            |                     |                 |                     |                 |                       |
| Nonuser (<28 cDDD)       | 269             | 189.2 (167.6–212.9)        | Reference           |                 | Reference           |                 | <0.001                |
| User (28–365 cDDDs)      | 112             | 203.3 (168.2–243.7)        | 0.918 (0.675–1.248) | 0.584           | 0.779 (0.610–0.994) | 0.045           |                       |
| User (>365 cDDDs)        | 113             | 146.2 (121.0–175.1)        | 0.714 (0.541–0.944) | 0.018           | 0.585 (0.456–0.750) | <0.001          |                       |

Abbreviations: AChEIs, acetylcholinesterase inhibitors

\*Adjustment for urbanization, socioeconomic status, comorbidities, and concomitant medications
